# Supplementary material for: CRISPR/Cas9-mediated mutagenesis of homologous genes in Chinese kale
Source: PubMed Central journal article supplement (PMC6235979; doi:10.1038/s41598-018-34884-9), 2018-11-14
Supplement: 41598_2018_34884_MOESM1_ESM.pdf [file 41598_2018_34884_MOESM1_ESM.pdf]

**Title page**

**CRISPR/Cas9-mediated mutagenesis of homologous genes in Chinese kale**

Bo Sun<sup>1,†</sup>, Aihong Zheng<sup>1,†</sup>, Min Jiang<sup>1</sup>, Shengling Xue<sup>1</sup>, Qiao Yuan<sup>1</sup>, Leiyu Jiang<sup>1</sup>, Qing Chen<sup>1</sup>,

Mengyao Li<sup>1</sup>, Yan Wang<sup>2</sup>, Yong Zhang<sup>1</sup>, Ya Luo<sup>1</sup>, Xiaorong Wang<sup>2</sup>, Fen Zhang<sup>1,\*</sup>, and Haoru Tang<sup>1,2,\*</sup>

<sup>1</sup>College of Horticulture, Sichuan Agricultural University, Chengdu 611130, China

<sup>2</sup>Institute of Pomology and Olericulture, Sichuan Agricultural University, Chengdu 611130, China

<sup>†</sup>These authors contributed equally.

## Supplemental Information

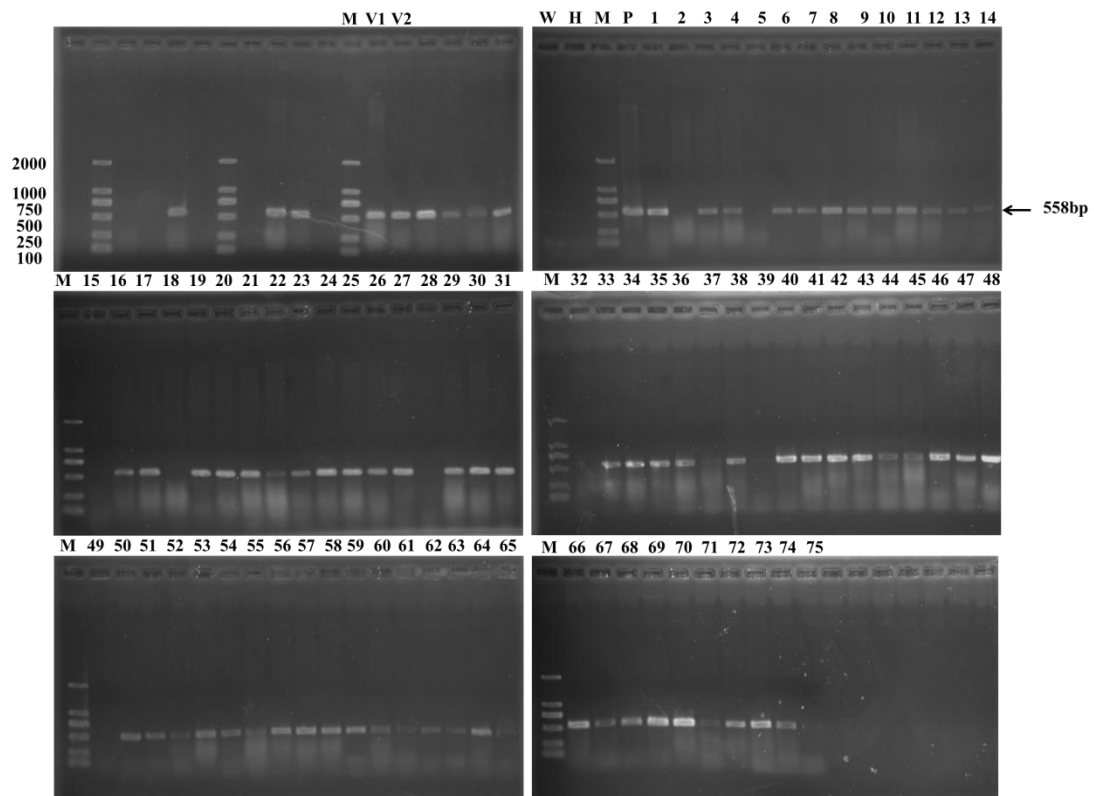

**Figure S1.** Original image shows the PCR detection of the hygromycin-resistant gene for the estimation of transformation efficiency.

M: DL2000 maker; V1,V2: empty vector was used as a positive control; P: plasmid which contain vector and sgRNA also was used as a positive control; W: gDNA of WT was as a negative control; H: H<sub>2</sub>O was as a negative control; 1-75: indicates the resistant plant line number; The arrow points to the aim band.
